# Supplementary material
Source: publisher figshare collection journal article supplement (https://frontiersin.figshare.com/ndownloader/files/26335519)
Supplement: Supplementary file 1 [file 26335519]

characteristic time	conc O2 micromolar	conc NO3 micromolar	conc DOC micromolar
0	250.	125.19253897460295	397.7615127463314
0.2891479185136163	126.80433643658029	125.15772265956264	274.52232878911127
0.45146265300064026	70.77384771387746	125.09873025770969	218.41809956409222
0.5715961056871816	40.964882598609464	124.99342266359812	188.47749995618483
0.676880830657512	25.067895165565044	124.81592951604549	172.35864608869954
0.7747428952825087	16.925018843325326	124.5647750353088	163.90182666553898
0.8684917964158781	12.490091832796434	124.25162918390184	159.07546734075143
0.9599633733192953	9.820235828009606	123.8850599799712	155.94739983105129
1.0503228483254985	8.064058019595164	123.4690136553396	153.67116411684734
1.1403847755286802	6.827008044911496	123.00473644204962	151.85376762555123
1.2307634722212686	5.9092058458271755	122.49200876348046	150.29505582825544
1.3219523990088586	5.2005899453810835	121.92974787439728	148.88361381645535
1.4143699003492025	4.636153419113955	121.3163010642012	147.55236877744312
1.5083875473046062	4.175221060044869	120.64959493647477	146.25805375871602
1.6043488767174965	3.791104729861861	119.92721495404669	144.9709624504979
1.7025825773404655	3.465589416184166	119.14644921074888	143.66948995769798
1.8034123741927164	3.185824754432083	118.30431290369488	142.3370549121284
1.9071649410965221	2.9424867473485476	117.39756207342245	140.96027836720427
2.0141766764218025	2.728645100512458	116.4227014337369	139.52786092076124
2.1247999028148676	2.5390401360022508	115.37598927288192	138.02986575518233
2.2394088987369005	2.3696067091893886	114.25344149397041	136.45724760473007
2.358406087850205	2.217152153973316	113.05083642966105	134.80153671912728
2.4822286757914727	2.0791331525698586	111.76372190078735	133.05462455663175
2.6113560195670105	1.9534978215847891	110.38742598381118	131.2086193294265
2.7463180369395332	1.8385718047975357	108.91707304951734	129.25575214477192
2.8877050108022213	1.7329746857966624	107.34760679906348	127.18832221270367
3.0361792195305473	1.6355576843107176	105.6738222241061	124.99867449252096
3.192488935368332	1.5453565453688023	103.89040862321814	122.67920635246917
3.357485490387364	1.4615554365956325	101.99200597425654	120.222401932494
3.532144331197182	1.3834589268736988	99.97327702962741	117.6208942419856
3.7175912965540214	1.310469964233973	97.82899737820992	114.86755571507406
3.9151357980568644	1.2420723465138201	95.55416527558344	111.95561796907081
4.126313228044162	1.1778165754808336	93.14413210672089	108.87882073695965
4.352939863005273	1.1173082613656655	90.59475268026391	105.63158813977326
4.597184940328771	1.060198437187084	87.90255187033888	102.20922730318841
4.86166673324324	1.0061752747971369	85.06490007807571	98.60813940046945
5.149582794173446	0.9549567821347238	82.08018420277728	94.82602606368407
5.464889883471269	0.9062841117795812	78.94795289889571	90.86206426347698
5.812557894421146	0.8599151260281513	75.66900443330898	86.71700969574206
6.19893702755358	0.8156178365334512	72.24537189075028	82.39317172804897
6.632303820096313	0.7731632466755377	68.68014268805567	77.89418063482285
7.123700161582052	0.7323169260882609	64.97702454295788	73.22443663286329
7.688273409180948	0.6928282388696624	61.13953091522805	68.38808091098245
8.347519012758669	0.6544153061291323	57.16958696328411	63.387238038311985
9.133254652847818	0.6167419776311317	53.06520507940545	58.21908735496563
10.095190285175214	0.5793789314727037	48.81652174147833	52.87087013639833
11.316773602337907	0.5417304543641266	44.39855857344669	47.31076769925024
12.952929893752827	0.502877549605071	39.75632785698799	41.469126398917766
15.338785304338995	0.46117726537455445	34.768099709502685	35.1921409303307
19.420410276815325	0.41290830840770004	29.124524062717605	28.089402414882432
30.32216171917234	0.3437853899260453	21.593648691051737	18.606685281807597
